# Supplementary material for: Advancing PLA 3D Printing with Laser Polishing: Improving Mechanical Strength, Sustainability, and Surface Quality
Source: MDPI journal article supplement (doi:10.3390/cryst13040626), 2023-04-05
Supplement: s1 [file s1]

# Advancing PLA 3D Printing with Laser Polishing: Improving Mechanical Strength, Sustainability, and Surface Quality

Ray Tahir Mushtaq <sup>1,\*,†</sup>, Asif Iqbal <sup>2</sup>, Yanen Wang <sup>1,\*,†</sup>, Aqib Mashood Khan <sup>3</sup>  
and Mohammad Iskandar Petra <sup>2</sup>

<sup>1</sup> Department of Industry Engineering, School of Mechanical Engineering,  
Northwestern Polytechnical University, Xi'an 710072, China

<sup>2</sup> Faculty of Integrated Technologies, Universiti Brunei Darussalam, Jalan Tungku Link,  
Gadong BE1410, Brunei

<sup>3</sup> Department of Mechatronics Engineering, Faculty of Engineering and Technology,  
University of Chakwal, Chakwal 48800, Pakistan

\* Correspondence: tahirmushtaqray@mail.nwpu.edu.cn (R.T.M.); wangyanen@126.com (Y.W.)

† These authors contributed equally to this work.

**Table S1.** Laser parameters.

| Parameter                      | Value       |
|--------------------------------|-------------|
| Laser on delay                 | 30 $\mu$ s  |
| Mode quality (M <sup>2</sup> ) | 1.24        |
| Power stability                | <+ or -5.5% |
| Laser off delay                | 150 $\mu$ s |
| Mark delay                     | 180 $\mu$ s |
| Poly delay                     | 170 $\mu$ s |
| Jump delay                     | 200 $\mu$ s |
| Jump speed                     | 3000 mm/s   |
